# Supplementary material
Source: ML conference proceedings conference paper supplement (https://openaccess.thecvf.com/content/CVPR_2019/html/Zhang_Ray-Space_Projection_Model_CVPR_2019_paper.html)
Supplement: Supplementary file 1 [file Zhang_Ray-Space_Projection_Model_CVPR_2019_supplemental.pdf]

# Supplementary Material: Ray-Space Projection Model for Light Field Camera\*

Qi Zhang<sup>1</sup>, Jinbo Ling<sup>1</sup>, Qing Wang<sup>1</sup>, and Jingyi Yu<sup>2</sup>

<sup>1</sup>School of Computer Science, Northwestern Polytechnical University, Xi'an 710072, P.R. China,

qwang@nwpu.edu.cn

<sup>2</sup>ShanghaiTech University, Shanghai 200031, P.R. China

As the supplementary material, we provide detailed derivation of the ray-space projection model in Sec. 3, the linear form and cost function in Sec. 4.

## 1. Equation

Before presenting the material, it helps to go over some equations involving cross product. If  $\mathbf{a} = (a_1, a_2, a_3)^\top$  is a 3D column vector, one defines a corresponding skew-symmetric matrix as follows [2]

$$[\mathbf{a}]_\times = \begin{bmatrix} 0 & -a_3 & a_2 \\ a_3 & 0 & -a_1 \\ -a_2 & a_1 & 0 \end{bmatrix}. \quad (1)$$

The cross product of two vectors  $\mathbf{a} \times \mathbf{b}$  is related to skew-symmetric matrices according to

$$\mathbf{a} \times \mathbf{b} = [\mathbf{a}]_\times \mathbf{b} = -[\mathbf{b}]_\times \mathbf{a}. \quad (2)$$

Let  $\mathbf{a}$ ,  $\mathbf{b}$  and  $\mathbf{c}$  be three vectors in  $\mathbb{R}^3$ . The following associative law holds,

$$\mathbf{a}^\top (\mathbf{b} \times \mathbf{c}) = (\mathbf{a} \times \mathbf{b})^\top \mathbf{c}. \quad (3)$$

### 1.1. Ray-Space Intrinsic Matrix (RSIM)

According to the homogeneous decoding matrix mentioned in the submission, we rewrite the decoding matrix as,

$$\begin{cases} s = k_i i, \\ t = k_j j, \\ x = k_u u + u_0, \\ y = k_v v + v_0, \end{cases} \quad (4)$$

where  $(k_i, k_j, k_u, k_v, u_0, v_0)$  are intrinsic parameters of a light field camera. Eq. (4) represents the relationship between the light field  $L(i, j, u, v)$  recorded by the camera and the undistorted physical light field  $L(s, t, x, y)$ . As mentioned in the submission, the moment vector and direction

vector of the undistorted physical ray  $\mathbf{r} = (s, t, x, y)$  are defined as,

$$\begin{cases} \mathbf{m} = (s, t, 0)^\top \times (x, y, 1)^\top = (t, -s, sy - tx)^\top, \\ \mathbf{q} = (x, y, 1)^\top \end{cases}, \quad (5)$$

where  $(\mathbf{m}^\top, \mathbf{q}^\top)^\top$  are the Plücker coordinates of the ray. Substituting  $s, t, x, y$  by Eq. (4), Eq. (5) becomes,

$$\begin{aligned} \mathbf{m} &= (k_j j, -k_i i, k_i i(k_v v + v_0) - k_j j(k_u u + u_0))^\top \\ &= (k_j j, -k_i i, k_i k_v (iv - ju) + k_i v_0 i - k_j u_0 j)^\top, \end{aligned} \quad (6)$$

which needs to satisfy the condition  $k_s/k_t = k_i/k_j$ . Meanwhile, the moment vector  $\mathbf{n}$  and direction vector  $\mathbf{p}$  of the ray  $\mathbf{l} = (i, j, u, v)$  recorded by the light field camera are represented as  $(i, j, 0)^\top \times (u, v, 1)^\top = (j, -i, iv - ju)^\top$  and  $(u, v, 1)$  respectively. Then, the RSIM  $\mathbf{K}$  is formulated as,

$$\begin{bmatrix} \mathbf{m} \\ \mathbf{q} \end{bmatrix} = \underbrace{\begin{bmatrix} k_j & 0 & 0 & 0 & 0 & 0 \\ 0 & k_i & 0 & 0 & 0 & 0 \\ -k_j u_0 & -k_i v_0 & k_i k_v & 0 & 0 & 0 \\ 0 & 0 & 0 & k_u & 0 & u_0 \\ 0 & 0 & 0 & 0 & k_v & v_0 \\ 0 & 0 & 0 & 0 & 0 & 1 \end{bmatrix}}_{=: \mathbf{K}} \begin{bmatrix} \mathbf{n} \\ \mathbf{p} \end{bmatrix}. \quad (7)$$

Fig. 1 illustrates the ray-space intrinsic transformations  $\mathcal{L}_c = \mathbf{K}\mathcal{L}$  and  $\mathcal{L}'_c = \mathbf{K}'\mathcal{L}'$ .

### 1.2. Fundamental Matrix

There are two constraints of the Plücker coordinates in 3D projective space. The one is  $\mathbf{m}^\top \cdot \mathbf{q} = 0$ , the other is *generalized epipolar constraint* [4],

$$\begin{aligned} \mathbf{q}'^\top \mathbf{E} \mathbf{q} + \mathbf{q}'^\top \mathbf{R} \mathbf{m} + \mathbf{m}'^\top \mathbf{R} \mathbf{q} &= 0, \\ \begin{bmatrix} \mathbf{m}' \\ \mathbf{q}' \end{bmatrix}^\top \begin{bmatrix} \mathbf{0}_{3 \times 3} & \mathbf{R}^\top \\ \mathbf{R}^\top & \mathbf{E}^\top \end{bmatrix} \begin{bmatrix} \mathbf{m} \\ \mathbf{q} \end{bmatrix} &= 0 \end{aligned} \quad (8)$$

which is obtained from the theorem that *two lines  $(\mathbf{m}_1, \mathbf{q}_1)^\top$  and  $(\mathbf{m}_2, \mathbf{q}_2)^\top$  are coplanar if and only if  $\mathbf{m}_1^\top \mathbf{q}_2 + \mathbf{q}_1^\top \mathbf{m}_2 = 0$*

\*The work was supported by NSFC under Grant 61531014.

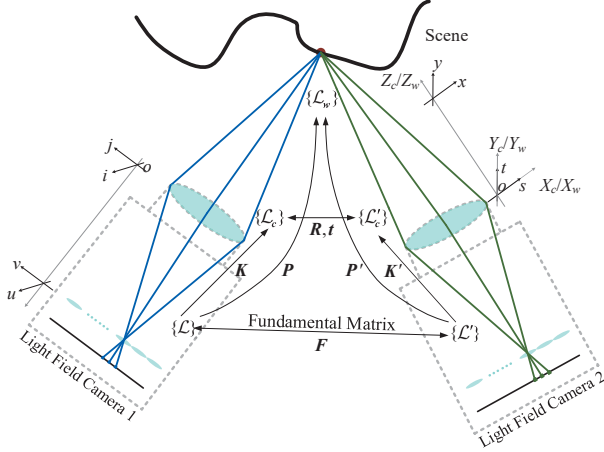

Figure 1. Ray-space projection model and ray-ray transformation among two light field cameras.

0.  $\mathbf{R}$ ,  $\mathbf{t}$  denote the rotation and translation between two light field cameras coordinates.

According to ray-space intrinsic matrix Eq. (7) and generalized epipolar constraint Eq. (8), we formulate the ray-ray transformation  $\{\mathcal{L}'\} \leftrightarrow \{\mathcal{L}\}$  as shown in Fig. 1,

$$\underbrace{\mathcal{L}'^\top \mathbf{K}'^\top \begin{bmatrix} \mathbf{0}_{3 \times 3} & \mathbf{R}^\top \\ \mathbf{R}^\top & \mathbf{E}^\top \end{bmatrix} \mathbf{K} \mathcal{L}}_{=: \mathbf{F}} = 0. \quad (9)$$

$\mathbf{F}$  is the fundamental matrix.  $\mathcal{L}'^\top \mathbf{F} \mathcal{L} = 0$  represents the ray-ray correspondences among two light fields.

### 1.3. The Relationship between Rays and Planes

According to the theorem [3], a Plücker line  $(\mathbf{m}^\top, \mathbf{q}^\top)^\top$  intersects with a plane in the point with homogeneous coordinate,

$$\mathbf{X} = (\boldsymbol{\pi} \times \mathbf{m} - d\mathbf{q}) / \boldsymbol{\pi}^\top \mathbf{q}, \quad (10)$$

where the plane in 3D space can be expressed by a homogeneous vector  $(\boldsymbol{\pi}^\top, d)^\top$ ,  $\boldsymbol{\pi} \in \mathbb{R}^3$ ,  $d \in \mathbb{R}$ . Therefore, a point  $\mathbf{X}_w$  in the world coordinates can be described as the intersection of the ray  $\mathcal{L}_w = (\mathbf{m}_w^\top, \mathbf{q}_w^\top)^\top$  with the plane  $Z = Z_w$  (i.e.  $\boldsymbol{\pi}_w = (0, 0, 1)^\top$ ,  $d_w = -Z_w$ ),

$$\mathbf{X}_w = ([\boldsymbol{\pi}_w]_\times \mathbf{m}_w + Z_w \mathbf{q}_w) / \boldsymbol{\pi}_w^\top \mathbf{q}_w. \quad (11)$$

Then, Eq. (11) is extended by Eq. (1),

$$\begin{bmatrix} X_w \\ Y_w \\ Z_w \end{bmatrix} = \begin{bmatrix} 0 & -1 & 0 \\ 1 & 0 & 0 \\ 0 & 0 & 0 \end{bmatrix} \mathbf{m}_w + \begin{bmatrix} Z_w & 0 & 0 \\ 0 & Z_w & 0 \\ 0 & 0 & Z_w \end{bmatrix} \mathbf{q}_w. \quad (12)$$

Being substituted by

$$\begin{bmatrix} X_w \\ Y_w \\ Z_w \end{bmatrix} = \begin{bmatrix} 0 & 0 & X_w \\ 0 & 0 & Y_w \\ 0 & 0 & Z_w \end{bmatrix} \mathbf{q}_w, \quad (13)$$

Eq. (12) becomes

$$\begin{bmatrix} 0 & -1 & 0 \\ 1 & 0 & 0 \\ 0 & 0 & 0 \end{bmatrix} \mathbf{m}_w + \begin{bmatrix} Z_w & 0 & -X_w \\ 0 & Z_w & -Y_w \\ 0 & 0 & 0 \end{bmatrix} \mathbf{q}_w = \mathbf{0}. \quad (14)$$

Then, Eq. (14) is simplified as

$$\underbrace{\begin{bmatrix} 1 & 0 & 0 & 0 & Z_w & -Y_w \\ 0 & 1 & 0 & -Z_w & 0 & X_w \end{bmatrix}}_{=: \mathbf{M}(X_w)} \begin{bmatrix} \mathbf{m}_w \\ \mathbf{q}_w \end{bmatrix} = \mathbf{0}. \quad (15)$$

### 1.4. Linear Form for the Calibration

As we have mentioned in the submission, we use the RSIM, ray-space extrinsic matrix and Eq. (15) to represent the relationship between a world point and its rays, i.e.,

$$\mathbf{M}(X_w) \begin{bmatrix} \mathbf{R}^\top & \mathbf{E}^\top \\ \mathbf{0}_{3 \times 3} & \mathbf{R}^\top \end{bmatrix} \mathbf{K} \begin{bmatrix} \mathbf{n} \\ \mathbf{p} \end{bmatrix} = \mathbf{0}, \quad (16)$$

where  $\mathbf{K}$  is the RSIM which is abbreviated to a lower triangle matrix  $\mathbf{K}_{ij}$  and an upper triangle matrix  $\mathbf{K}_{uv}$ . According to an essential assumption that the checkerboard is on the plane  $Z_w = 0$  in the world coordinates, Eq. (16) is simplified as,

$$\underbrace{\begin{bmatrix} 1 & 0 & -Y_w \\ 0 & 1 & X_w \end{bmatrix}}_{=: \mathbf{H}_s} \mathbf{H}_s \begin{bmatrix} \mathbf{n} \\ \mathbf{p} \end{bmatrix} = \mathbf{0}, \quad (17)$$

where  $\mathbf{H}_s$  is the simplified ray-space projection matrix. We utilize the direct product operator to compute  $\mathbf{H}_s$ . Subsequently,  $\mathbf{H}_s$  denotes a  $3 \times 6$  matrix only using intrinsic and extrinsic parameters,

$$\mathbf{H}_s = \begin{bmatrix} \mathbf{h}_1 & \mathbf{h}_3 \\ \mathbf{h}_2 & \mathbf{h}_4 \\ \mathbf{0}_{3 \times 3} & \mathbf{h}_5 \end{bmatrix} = \begin{bmatrix} \mathbf{r}_1^\top & -\mathbf{r}_1^\top [\mathbf{t}]_\times \\ \mathbf{r}_2^\top & -\mathbf{r}_2^\top [\mathbf{t}]_\times \\ \mathbf{0}_{1 \times 3} & \mathbf{r}_3^\top \end{bmatrix} \begin{bmatrix} \mathbf{K}_{ij} & \mathbf{0}_{3 \times 3} \\ \mathbf{0}_{3 \times 3} & \mathbf{K}_{uv} \end{bmatrix}, \quad (18)$$

where  $\mathbf{h}_i$  denotes the row vector  $(h_{i1}, h_{i2}, h_{i3})$ .

$$\begin{cases} \mathbf{h}_1 = \mathbf{r}_1^\top \mathbf{K}_{ij}, \\ \mathbf{h}_2 = \mathbf{r}_2^\top \mathbf{K}_{ij}, \\ \mathbf{h}_3 = ([\mathbf{t}]_\times \mathbf{r}_1)^\top \mathbf{K}_{uv}, \\ \mathbf{h}_4 = ([\mathbf{t}]_\times \mathbf{r}_2)^\top \mathbf{K}_{uv}, \\ \mathbf{h}_5 = \mathbf{r}_3^\top \mathbf{K}_{uv}. \end{cases} \quad (19)$$

Then, we utilize the orthogonality of  $\mathbf{r}_1$  and  $\mathbf{r}_2$  and the Cholesky factorization [1] to obtain the estimated intrinsic matrix  $\hat{\mathbf{K}}_{ij}$  which is determined up to an unknown scale factor. The effect of the scale factor is eliminated by calculating the ratio of elements. Therefore, we compute the intrinsic matrix  $\hat{\mathbf{K}}_{uv}$ . Note that the matrix  $\mathbf{H}_s$  occurring in Eq. (17) may be changed by multiplication by an arbitrary non-zero scale factor without altering the projective transformation. According to the last formula of Eq. (19) and unit norm of  $\mathbf{r}_i$ , we calculate a scale factor

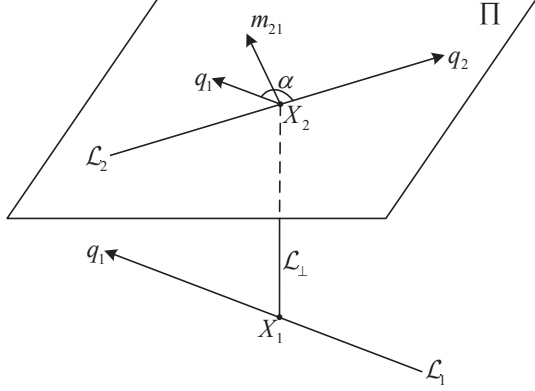

Figure 2. The distance between  $\mathcal{L}_1$  and  $\mathcal{L}_2$ . The common perpendicular  $\mathcal{L}_\perp$  intersects two lines at  $\mathbf{X}_1$  and  $\mathbf{X}_2$  respectively.

$\tau = 1/\|\hat{\mathbf{K}}_{uv}^{-\top} \mathbf{h}_5^\top\|$ . Adopting Eq. (2) to Eq. (19), it can be rewritten as,

$$\begin{cases} -[\mathbf{r}_1]_\times \mathbf{t} = \tau \hat{\mathbf{K}}_{uv}^{-\top} \mathbf{h}_3^\top \\ -[\mathbf{r}_2]_\times \mathbf{t} = \tau \hat{\mathbf{K}}_{uv}^{-\top} \mathbf{h}_4^\top \end{cases} \quad (20)$$

These equations can be solved by linear least-squares techniques to obtain the translation  $\mathbf{t}$ , *i.e.*

$$\begin{aligned} \mathbf{t} &= (\mathbf{G}^\top \mathbf{G})^{-1} (\mathbf{G}^\top \mathbf{g}), \\ \mathbf{G} &= (-[\mathbf{r}_1]_\times, -[\mathbf{r}_2]_\times)^\top, \\ \mathbf{g} &= (\tau \hat{\mathbf{K}}_{ij}^{-\top} \mathbf{h}_3^\top, \tau \hat{\mathbf{K}}_{ij}^{-\top} \mathbf{h}_4^\top)^\top. \end{aligned} \quad (21)$$

### 1.5. Ray-to-Ray Cost Function

In the submission, a ray-to-ray cost function is established for non-linear optimization. The ray-to-ray cost is described as the distance between rays, as shown in Fig. 2. It illustrates the distance between  $\mathcal{L}_1 = (\mathbf{m}_1^\top, \mathbf{q}_1^\top)^\top$  and  $\mathcal{L}_2 = (\mathbf{m}_2^\top, \mathbf{q}_2^\top)^\top$ . The lines  $\mathcal{L}_1$  and  $\mathcal{L}_2$  are not parallel to each other. Referring to Fig. 2, the plane  $\Pi$  containing  $\mathbf{X}_2$  and  $\mathbf{m}_{21}$  is orthogonal to  $\mathcal{L}_\perp$  and parallel to  $\mathcal{L}_1$ .  $\mathbf{m}_{21}$  is the moment vector of  $\mathcal{L}_2$  about a point  $\mathbf{X}_1$  on  $\mathcal{L}_1$ . This moment is defined as,

$$\begin{aligned} \mathbf{m}_{21} &= (\mathbf{X}_2 - \mathbf{X}_1) \times \mathbf{q}_2 \\ &= \mathbf{m}_2 - \mathbf{X}_1 \times \mathbf{q}_2 \end{aligned} \quad (22)$$

In Fig. 2,  $\alpha$  is the angle of rotation from  $\mathbf{q}_1$  to  $\mathbf{q}_2$ . We can obtain  $|\sin \alpha| = \|\mathbf{q}_1 \times \mathbf{q}_2\| / (\|\mathbf{q}_1\| \cdot \|\mathbf{q}_2\|)$ . Since  $\mathbf{m}_{21} \perp \mathbf{q}_2$ , we drive,

$$\begin{aligned} \mathbf{q}_1^\top \mathbf{m}_{21} &= \|\mathbf{m}_{21}\| \cdot \|\mathbf{q}_1\| \cos(\alpha - \frac{\pi}{2}), \\ &= \|\mathbf{m}_{21}\| \cdot \|\mathbf{q}_1\| |\sin \alpha| \end{aligned} \quad (23)$$

The above yields the distance between  $\mathcal{L}_1$  and  $\mathcal{L}_2$ ,

$$\begin{aligned} d &= \|\mathbf{X}_2 - \mathbf{X}_1\| = \frac{\|\mathbf{m}_{21}\|}{\|\mathbf{q}_2\|} = \frac{|\mathbf{q}_1^\top \mathbf{m}_{21}|}{\|\mathbf{q}_1\| \cdot \|\mathbf{q}_2\| |\sin \alpha|} \\ &= \frac{|\mathbf{q}_1^\top \mathbf{m}_{21}|}{\|\mathbf{q}_1 \times \mathbf{q}_2\|} = \frac{|\mathbf{q}_1^\top (\mathbf{m}_2 - \mathbf{X}_1 \times \mathbf{q}_2)|}{\|\mathbf{q}_1 \times \mathbf{q}_2\|} \\ &= \frac{|\mathbf{q}_1^\top \mathbf{m}_2 - (\mathbf{q}_1 \times \mathbf{X}_1)^\top \mathbf{q}_2|}{\|\mathbf{q}_1 \times \mathbf{q}_2\|} \\ &= \frac{|\mathbf{q}_1^\top \mathbf{m}_2 + \mathbf{m}_1^\top \mathbf{q}_2|}{\|\mathbf{q}_1 \times \mathbf{q}_2\|} \end{aligned} \quad (24)$$

### References

- [1] Richard Hartley. Self-calibration of stationary cameras. *IJCV*, 22(1):5–23, 1997.
- [2] Richard Hartley and Andrew Zisserman. *Multiple view geometry in computer vision*. Cambridge University Press, 2003.
- [3] William Vallance Douglas Hodge, WVD Hodge, and Daniel Pedoe. *Methods of algebraic geometry*, volume 2. Cambridge University Press, 1994.
- [4] Robert Pless. Using many cameras as one. In *IEEE CVPR*, volume 2, pages 587–593, 2003.
